# Supplementary material
Source: PubMed Central journal article supplement (PMC7175459)
Supplement: ic0c00263_si_001.pdf [file ic0c00263_si_001.pdf]

# Electronic Supporting Information

## Strong Impact of Intramolecular Hydrogen Bonding on the Cathodic Path of [Re (3,3'-dihydroxy-2,2'-bipyridine)(CO)<sub>3</sub>Cl] and Catalytic Reduction of Carbon Dioxide

James O. Taylor<sup>1</sup>, Gaia Neri<sup>2</sup>, Liam Banerji<sup>2</sup>, Alexander J. Cowan<sup>2</sup> and František Hartl<sup>1\*</sup>

<sup>1</sup>Department of Chemistry, University of Reading, Reading, England, RG6 6AD, United Kingdom

<sup>2</sup>Department of Chemistry, Stephenson Institute for Renewable Energy, University of Liverpool, L69 7ZF, United Kingdom

Corresponding Author

E-mail: f.hartl@reading.ac.uk

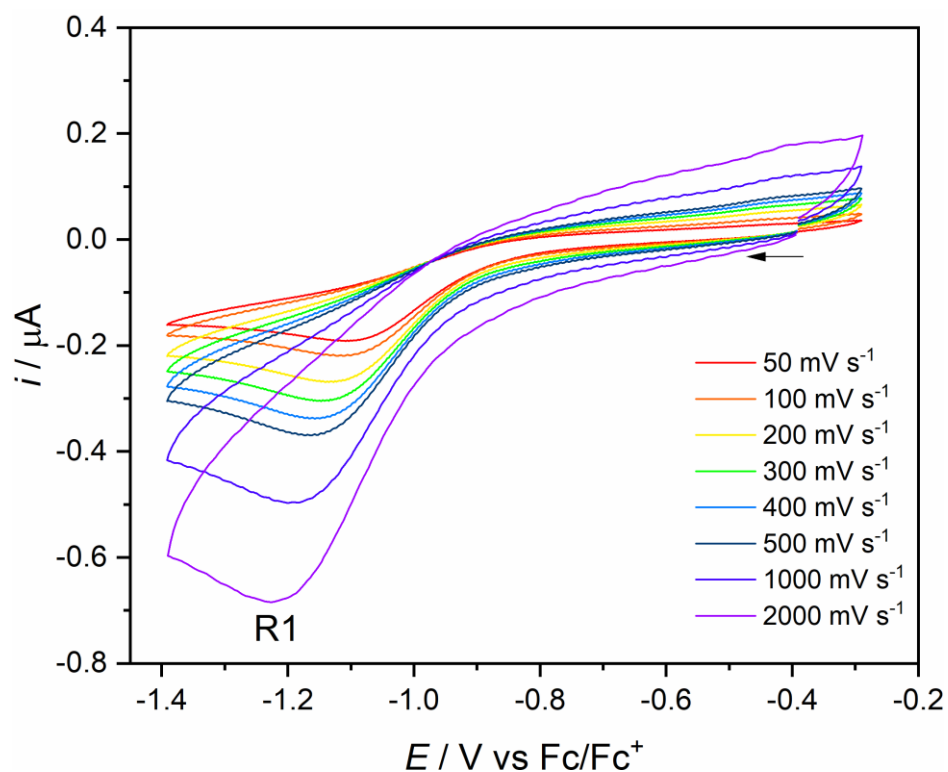

**Figure S1:** Cyclic voltammograms of  $[\text{Re}(3,3'\text{-DHBPY})(\text{CO})_3\text{Cl}]$  in  $\text{THF}/\text{Bu}_4\text{NPF}_6$  in the region of R1. Experimental conditions: Pt microdisc,  $T = 298 \text{ K}$ , scan rates  $\nu = 50 - 2000 \text{ mV s}^{-1}$ .

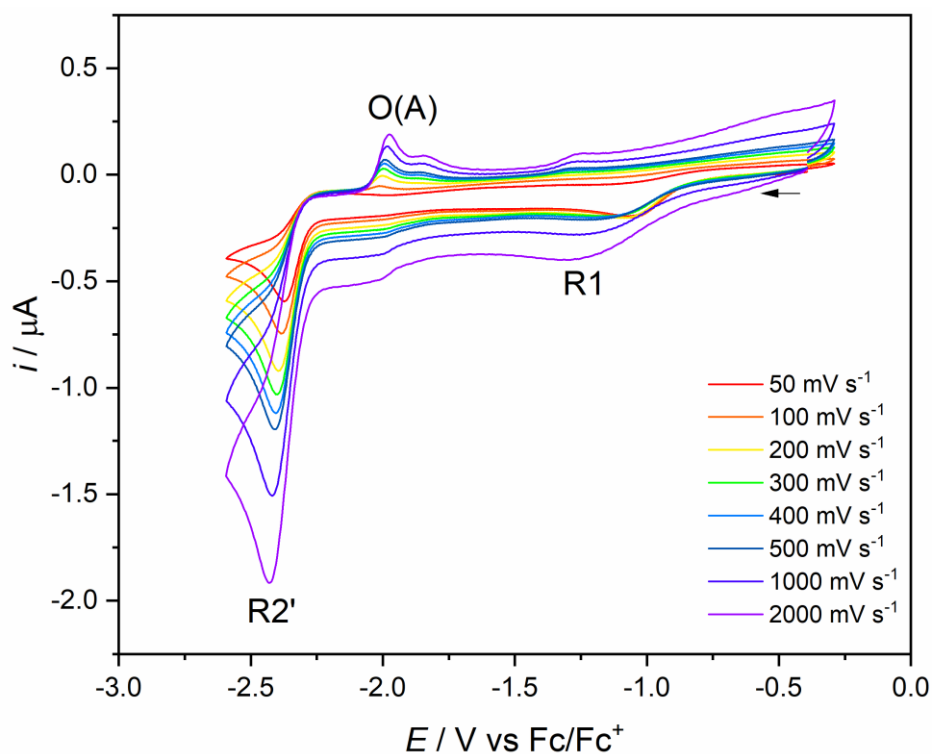

**Figure S2:** Cyclic voltammograms of  $[\text{Re}(3,3'\text{-DHBPY})(\text{CO})_3\text{Cl}]$  in  $\text{THF}/\text{Bu}_4\text{NPF}_6$  across the full cathodic region. Experimental conditions: Pt microdisc,  $T = 298 \text{ K}$ , scan rates  $\nu = 50 - 2000 \text{ mV s}^{-1}$ .

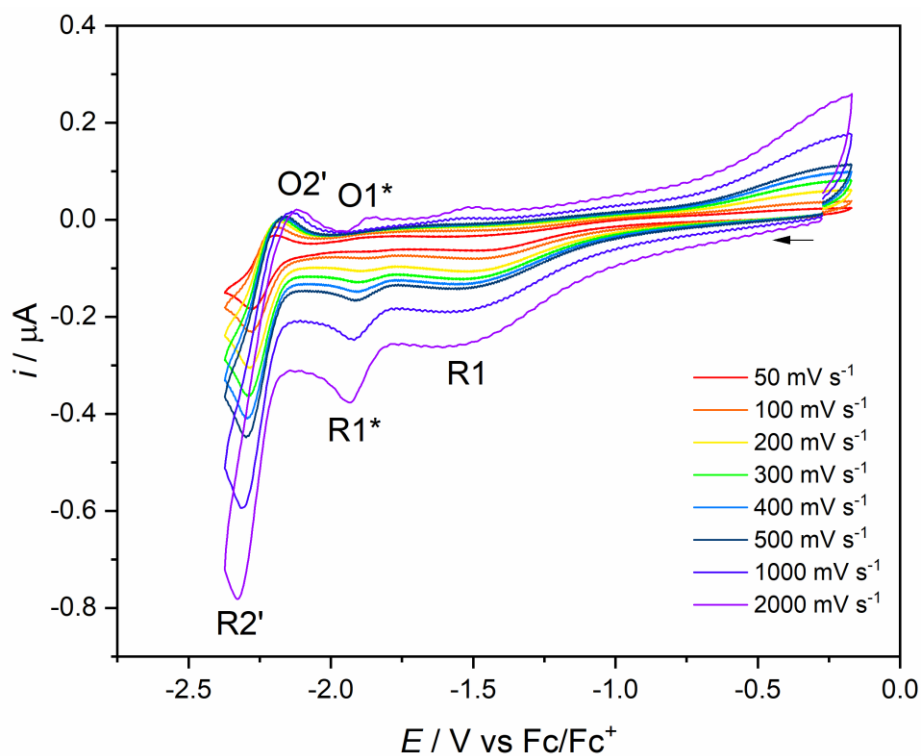

**Figure S3:** Cyclic voltammograms of  $[\text{Re}(3,3'\text{-DHBPY})(\text{CO})_3\text{Cl}]$  in  $\text{THF}/\text{Bu}_4\text{NPF}_6$  across the cathodic potential region. Experimental conditions: Pt microdisc,  $T = 195 \text{ K}$ , scan rates  $\nu = 50 - 2000 \text{ mV s}^{-1}$ .

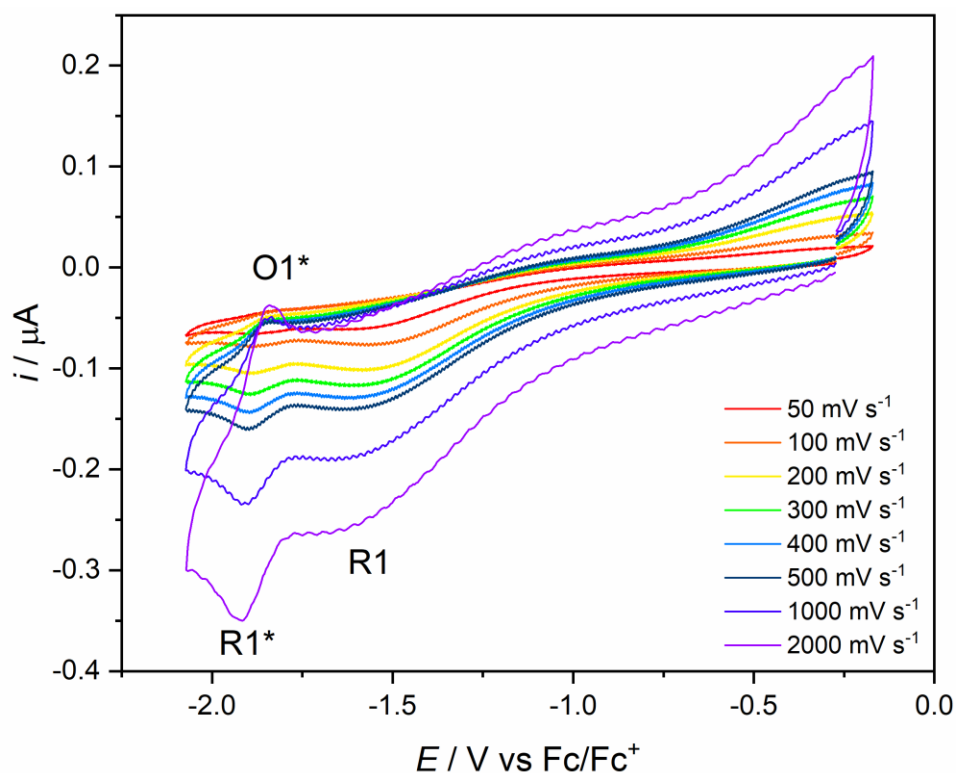

**Figure S4:** Cyclic voltammograms of  $[\text{Re}(3,3'\text{-DHBPY})(\text{CO})_3\text{Cl}]$  in  $\text{THF}/\text{Bu}_4\text{NPF}_6$  up to  $\text{R1}^*$ . Experimental conditions: Pt microdisc,  $T = 195 \text{ K}$ , scan rates  $\nu = 50 - 2000 \text{ mV s}^{-1}$ .

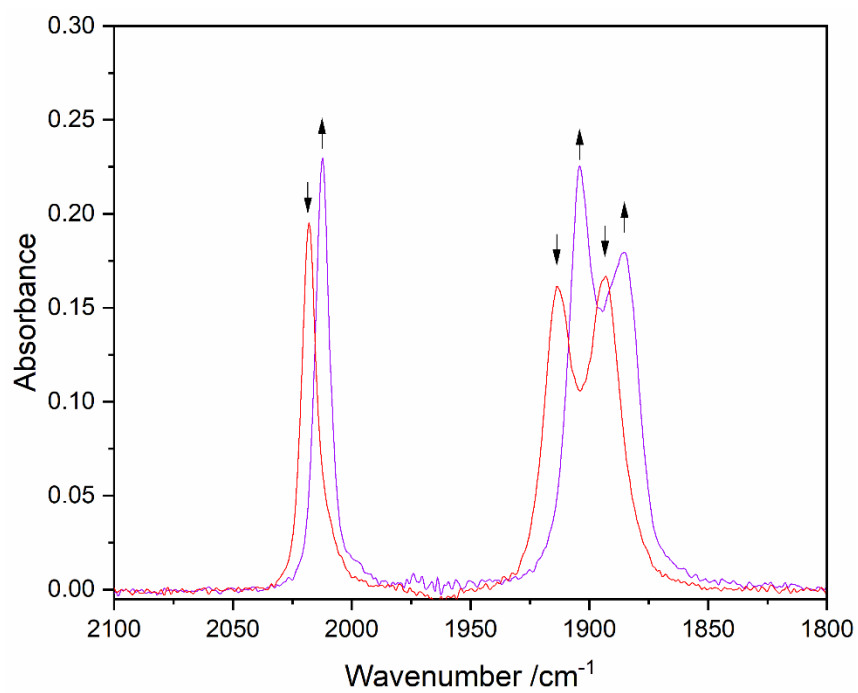

**Figure S5.** Chemical deprotonation of [Re(3,3'-DHBPY)(CO)<sub>3</sub>Cl] to [Re(3,3'-DHBPY-H<sup>+</sup>)(CO)<sub>3</sub>Cl]<sup>-</sup> in THF caused by the addition of 1 equiv. NaHMDS.

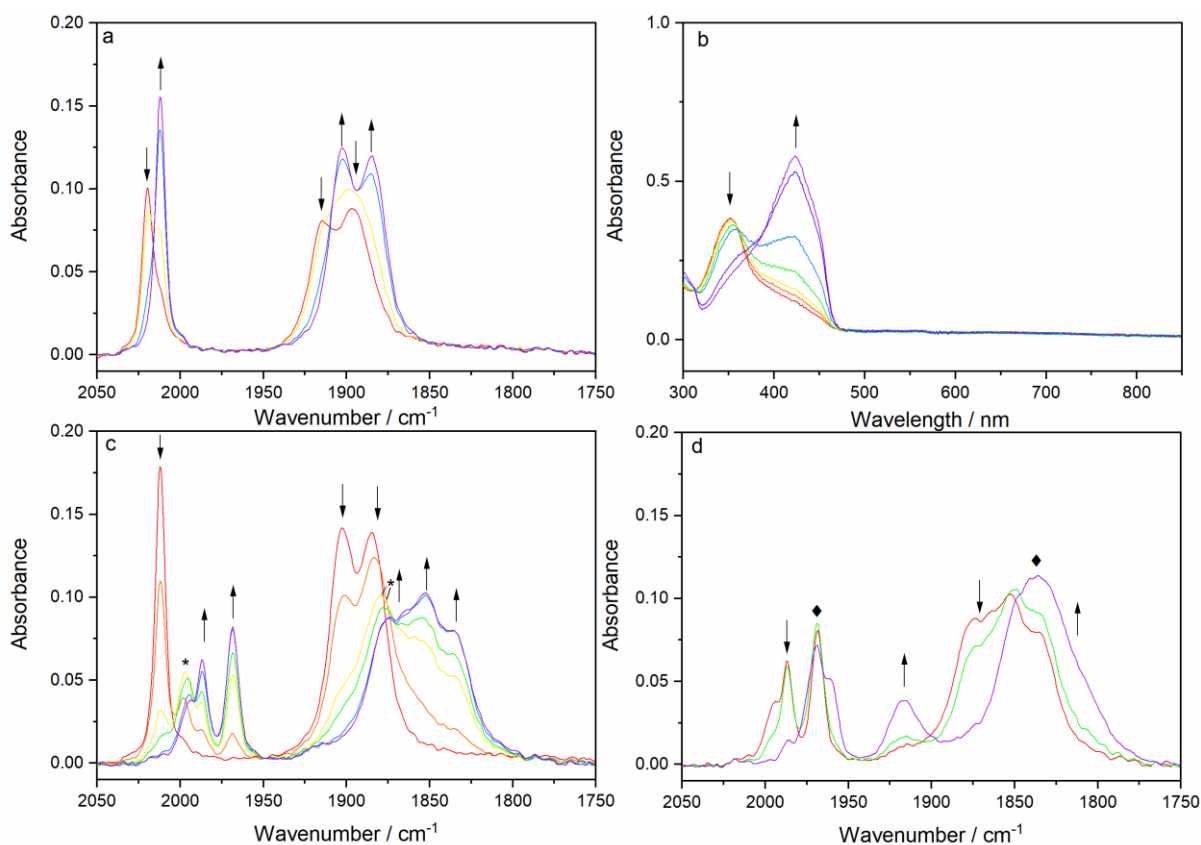

**Figure S6.** (a) IR and (b) UV-VIS spectroelectrochemistry of  $[\text{Re}(3,3'\text{-DHBPY})(\text{CO})_3\text{Cl}]$  ( $\downarrow$ ) in  $\text{PrCN}/\text{Bu}_4\text{NPF}_6$  at 298 K as it is converted by reductive deprotonation at R1 to  $[\text{Re}(3,3'\text{-DHBPY-H}^+)(\text{CO})_3\text{Cl}]^-$  ( $\uparrow$ ) in an OTTE cell. (c) IR spectroelectrochemistry of  $[\text{Re}(3,3'\text{-DHBPY-H}^+)(\text{CO})_3\text{Cl}]^-$  ( $\downarrow$ ) as it undergoes,  $1e^-$  reduction at the onset of R2' and ETC conversion to  $[\text{Re}(3,3'\text{-DHBPY})(\text{CO})_3\text{Cl}]^-$  (\*). The latter radical anion is further reduced on scanning through R2', forming the 6-coordinate redox couple  $[\text{Re}(3,3'\text{-DHBPY-2H}^+)(\text{CO})_3(\text{PrCN})]^{n-}$  ( $n = 2, 3$ ) ( $\uparrow$ ) existing in redox equilibrium (cf. Figure 11). (d)  $[\text{Re}(3,3'\text{-DHBPY-2H}^+)(\text{CO})_3(\text{PrCN})]^{2-}$  ( $\downarrow$ ) continues to reduce by a small negative potential shift, generating mainly 5-coordinate  $[\text{Re}(3,3'\text{-DHBPY-2H}^+)(\text{CO})_3]^{3-}$  ( $\uparrow$ ) in equilibrium with 6-coordinate  $[\text{Re}(3,3'\text{-DHBPY-2H}^+)(\text{CO})_3(\text{PrCN})]^{3-}$  ( $\blacklozenge$ ).

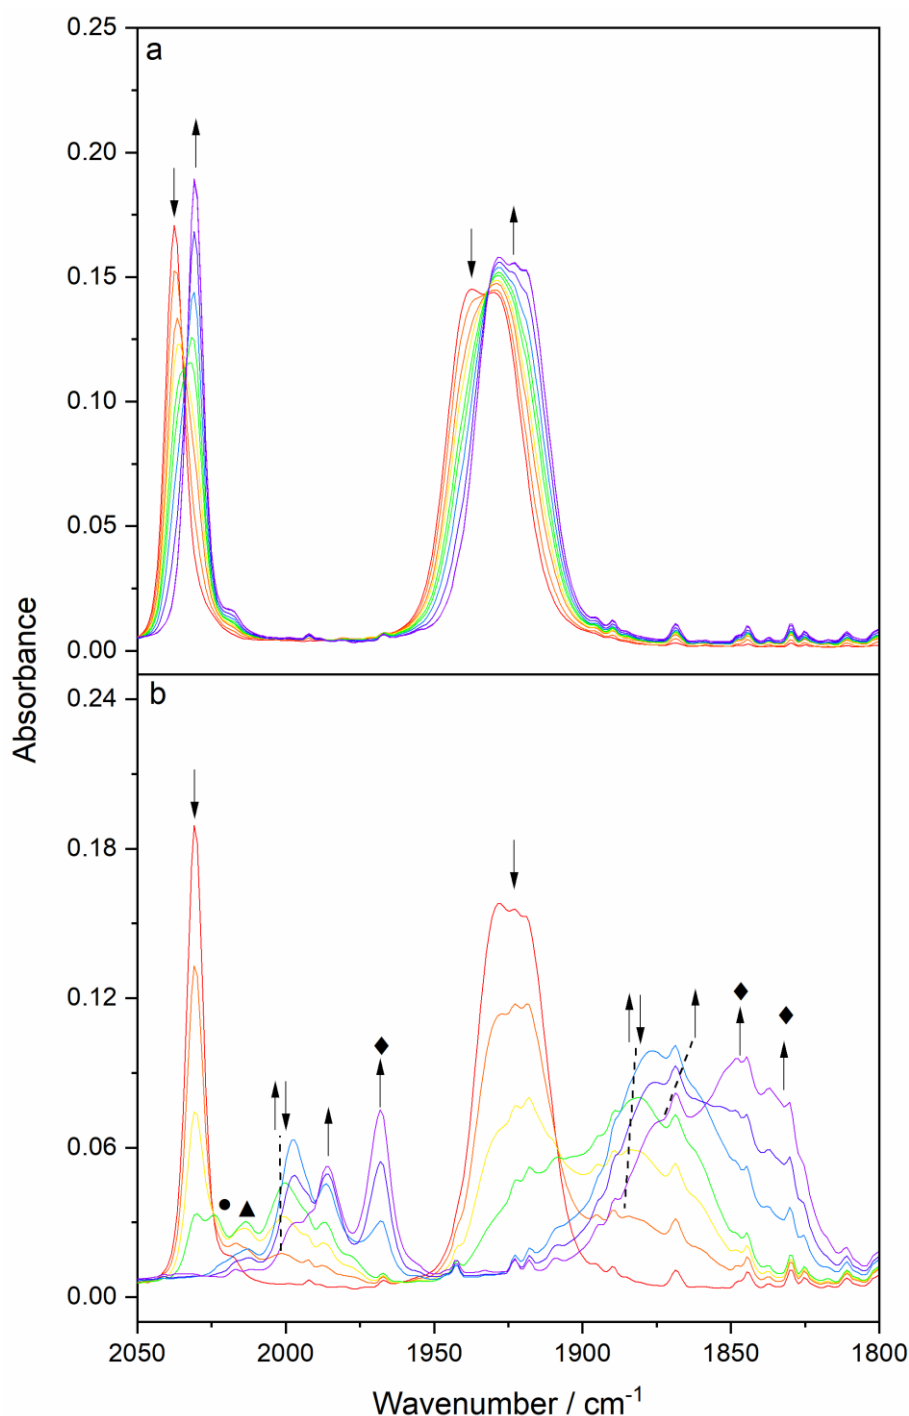

**Figure S7.** Cathodic IR spectroelectrochemistry of  $[\text{Re}(3,3'\text{-DHBPY})(\text{CO})_3(\text{PrCN})]^+$  in  $\text{PrCN}/\text{Bu}_4\text{NPF}_6$  at 223 K. (a)  $1e^-$  reduction of the parent complex ( $\downarrow$ ) at R1 producing deprotonated  $[\text{Re}(3,3'\text{-DHBPY-H}^+)(\text{CO})_3(\text{PrCN})]$  ( $\uparrow$ ). (b) Subsequent reduction of  $[\text{Re}(3,3'\text{-DHBPY-H}^+)(\text{CO})_3(\text{PrCN})]$  ( $\downarrow$ ) at R2' to give a mixture of products with dominating  $[\text{Re}(3,3'\text{-DHBPY})(\text{CO})_3(\text{PrCN})]$  ( $\uparrow\downarrow$ ) formed in an ETC step. The small band labelled with  $\bullet$  may belong to marginal reductively double-deprotonated  $[\text{Re}(3,3'\text{-DHBPY-2H}^+)(\text{CO})_3(\text{PrCN})]^-$ . Its  $1e^-$  and  $2e^-$  reduced forms,  $[\text{Re}(3,3'\text{-DHBPY}^{2-}\text{-2H}^+)(\text{CO})_3(\text{PrCN})]^{2-}$  ( $\uparrow$ ) and  $[\text{Re}(3,3'\text{-DHBPY}^{2-}\text{-2H}^+)(\text{CO})_3(\text{PrCN})]^{3-}$  ( $\blacklozenge$ ), terminate the cathodic path. The label  $\blacktriangle$  denotes an unassigned reduced intermediate (see also Figure 11b).

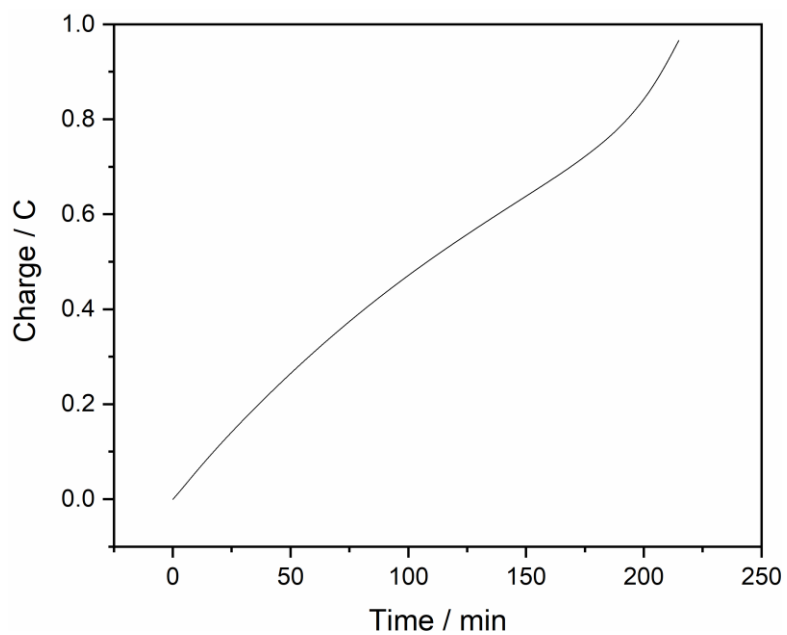

**Figure S8.** Charge vs time plot following the CPE of 3 mM  $[\text{Re}(3,3'\text{-DHBPY})(\text{CO})_3\text{Cl}]$  in  $\text{CO}_2$ -saturated 0.5 M THF/ $\text{Bu}_4\text{NPF}_6$ . The catalytic electrode potential was held at - 2.6 V vs  $\text{Fc}/\text{Fc}^+$  for 3 h, using a Pt microdisc electrode (diameter of 2 mm).

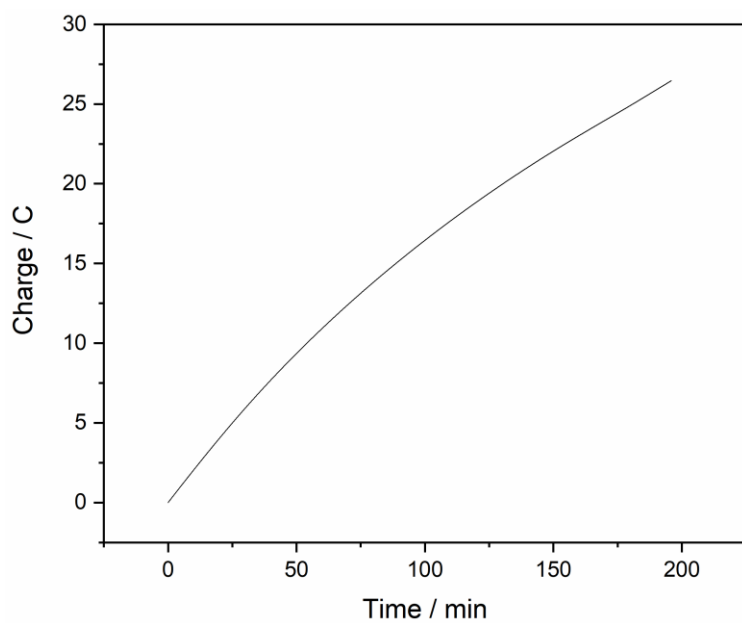

**Figure S9.** Charge vs time plot following the CPE of 3 mM  $[\text{Re}(3,3'\text{-DHBPY})(\text{CO})_3\text{Cl}]$  in  $\text{CO}_2$ -saturated 0.5 M THF/ $\text{Bu}_4\text{NPF}_6$ . The catalytic electrode potential was held at - 2.6 V vs  $\text{Fc}/\text{Fc}^+$  for 3 h, using a Pt foil electrode (surface area of  $2 \times 0.96 \text{ cm}^2$ ).

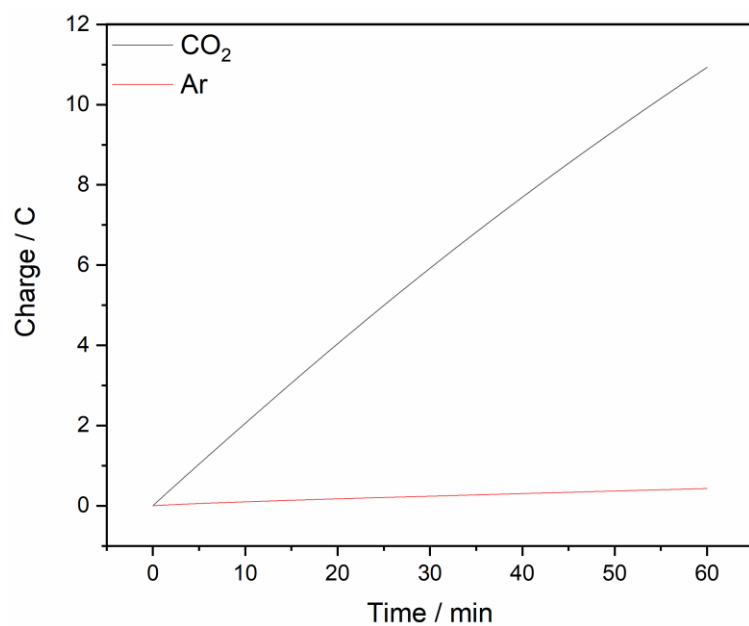

**Figure S10.** Charge vs time plot following the CPE of 3 mM [Re(3,3'-DHBPY)(CO)<sub>3</sub>Cl] in CO<sub>2</sub>-saturated (black) and Ar-saturated (red) 0.5 M THF/Bu<sub>4</sub>NPF<sub>6</sub>. The catalytic electrode potential was held at - 2.6 V vs Fc/Fc<sup>+</sup> for 1 h, using a Pt foil electrode (surface area of 2 × 0.96 cm<sup>2</sup>).
